# Supplementary material for: The pivotal step of nanoparticle functionalization for the preparation of functional and magnetic hybrid opal films
Source: Royal Society of Chemistry journal article supplement (doi:10.1039/c5tc04388c), 2016-01-01
Supplement: c5tc04388c1.pdf [file c5tc04388c1.pdf]

Supporting Information for the manuscript

# The Pivotal Step of Nanoparticle Functionalization for the Preparation of Functional and Magnetic Hybrid Opal Films

D. Scheid<sup>a</sup>, D. Stock<sup>a</sup>, T. Winter<sup>a</sup>, T. Gutmann<sup>b,\*</sup>, C. Dietz<sup>c,d</sup>, and M. Gallej<sup>a,\*</sup>

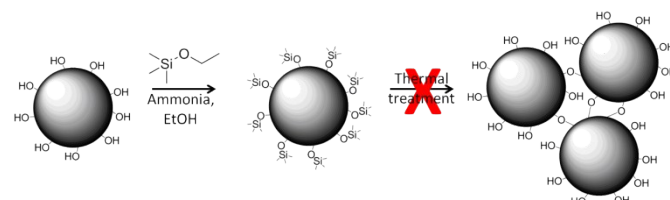

Fig. S1 Modification of silica surface with TMES avoiding inter-particle condensation reactions.

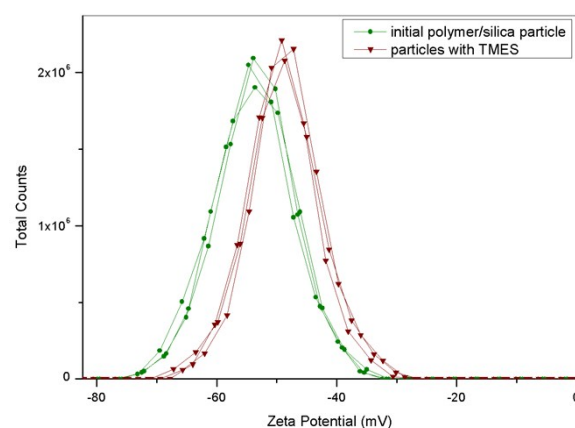

Fig. S2. Zeta potential of initial hybrid particles and TMES-modified particles.

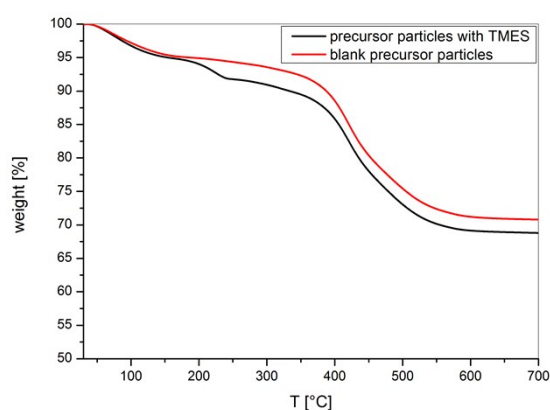

Fig. S3. TGA measurement of bare polymer/silica particles and particles modified with TMES.

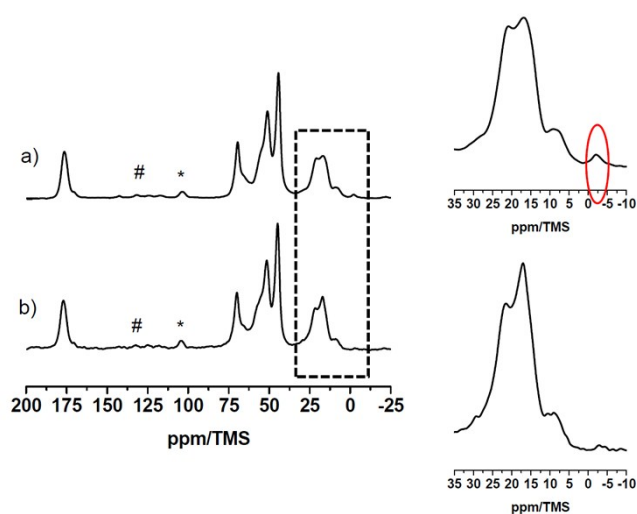

**Fig. S4.**  $^{13}\text{C}$  CP MAS spectra measured at 11 kHz spinning with a contact time of 2 ms of a) sample TMES, and b) sample Stöber. Note: Signals marked with # and \* are spinning sidebands.

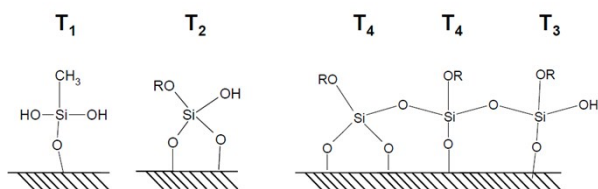

**Fig. S5.** Structural assignment of Tn groups (derived from Albert *et al.*).<sup>25</sup>

**Table S1.**  $T_1$  relaxation times for  $^{29}\text{Si}$  extracted by biexponential fit of the data from saturation recovery experiments.

| Sample Name             | T1 short | T1 long |
|-------------------------|----------|---------|
| Sample TMES             | 15.4 s   | 134.4 s |
| Sample Stöber           | 1.9 s    | 62.1 s  |
| Sample Nanorattle 500°C | 1.5 s    | 31.5 s  |

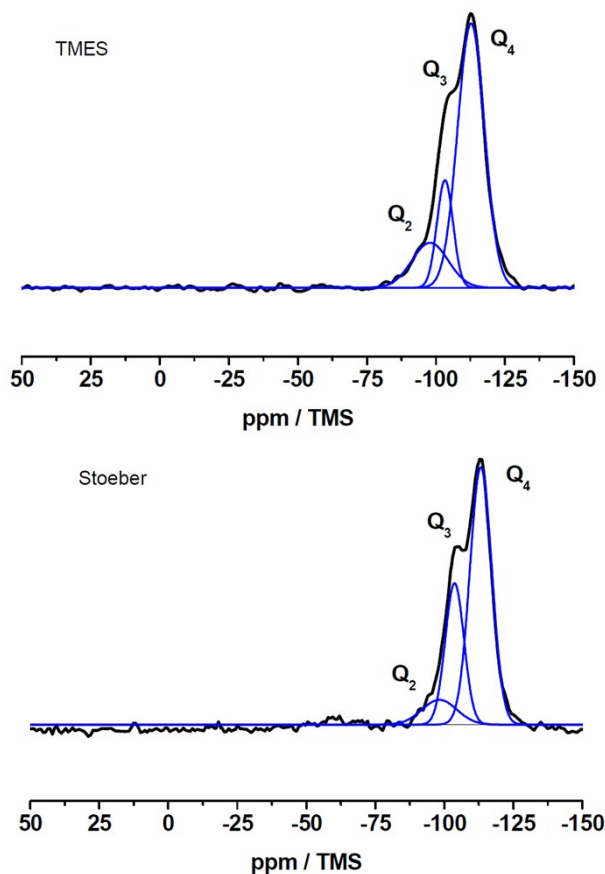

**Fig. S6.**  $^{29}\text{Si}$  MAS spectra measured at 8 kHz spinning for quantification of  $Q_n$  groups for sample TMES measured with  $d1=412\text{s}$  and sample Stöber with  $d1=300\text{s}$

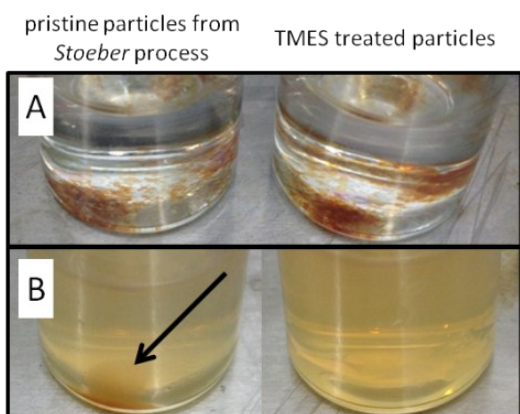

**Fig. S7.** Dispersions of the pristine particles obtained from the Stöber process (left) and particles treated with TMES (right) in water (after thermal treatment for 5h at 500 °C) are compared before (A) and after

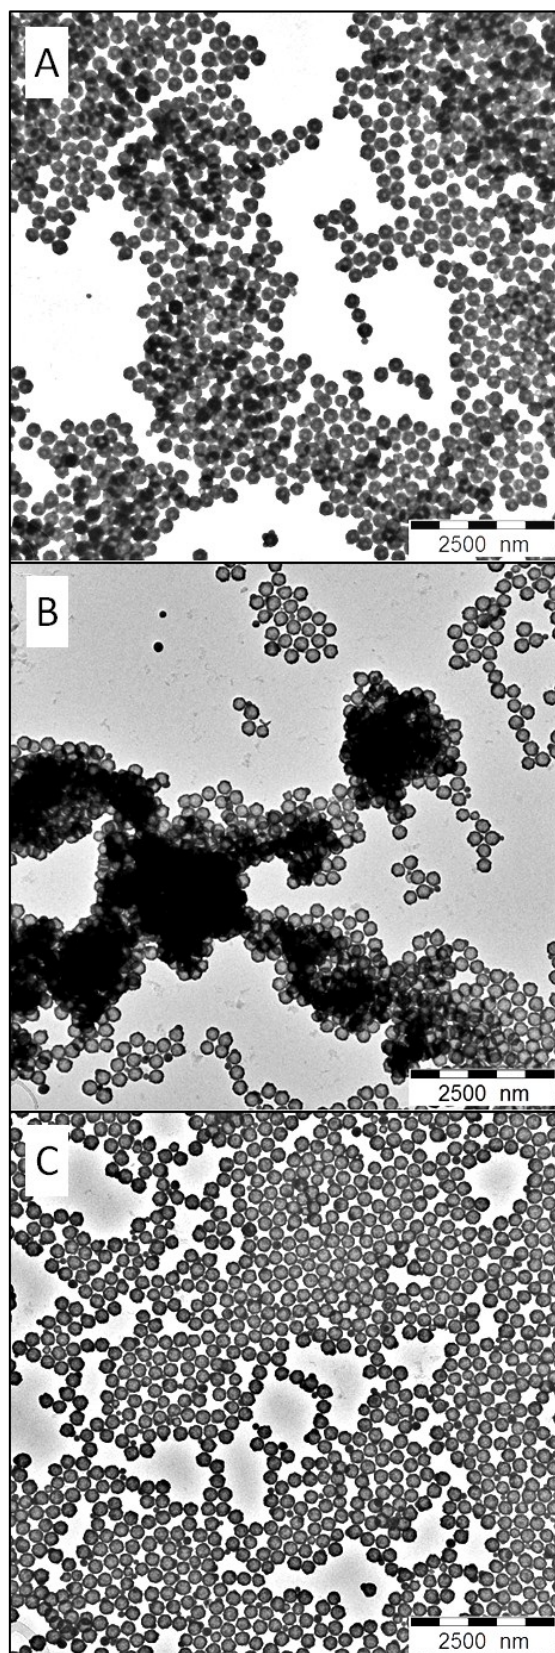

**Fig. S8.** TEM image of the particle dispersions in water on carbon-coated copper grids after drying using the drop-cast method for the initial polymer/silica particle sample (A), after thermal treatment 5h, 500°C (B) and TMES modified particles after thermal treatment (C).

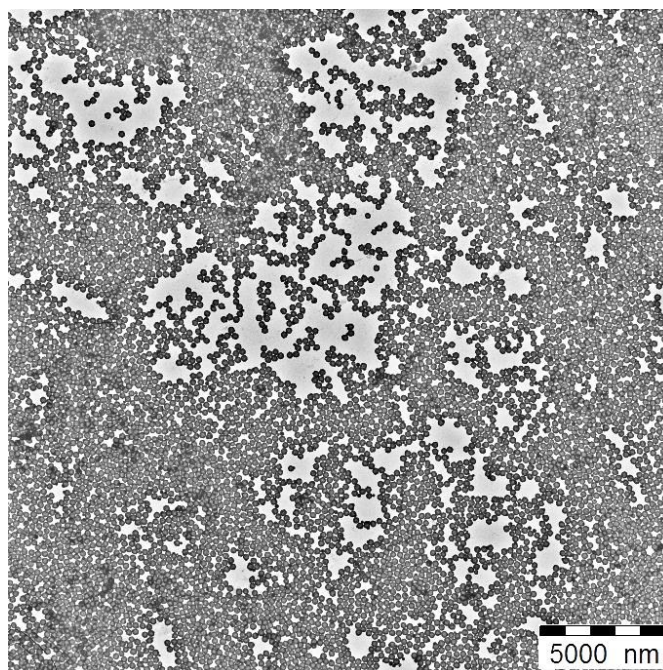

**Fig. S9.** TEM image of TMES-modified silica particles after thermal treatment and dispersing in water on carbon-coated copper grid after drying using the drop-cast method.

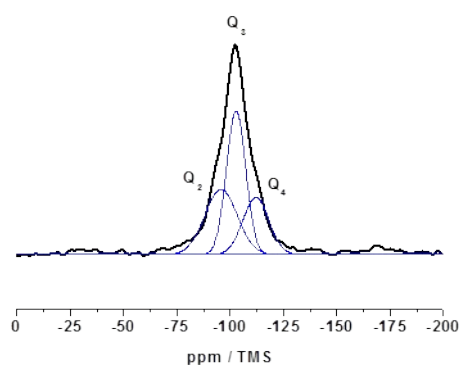

**Fig. S10.**  $^{29}\text{Si}$  CP-MAS spectra of nanorattles after heat treatment at 500 °C.

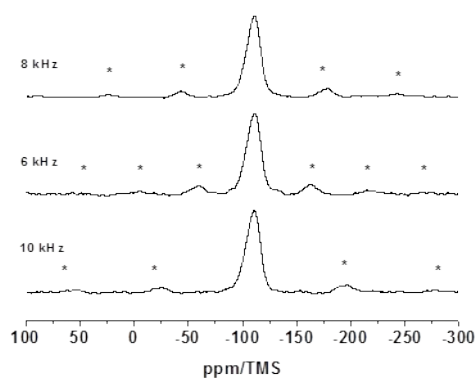

**Fig. S11.**  $^{29}\text{Si}$  MAS spectra measured at different spinning rates employing a recycle delay of 2.5s and 5400 scans for the 8 kHz respectively 1536 scans for the 6 and the 10 kHz spectra.

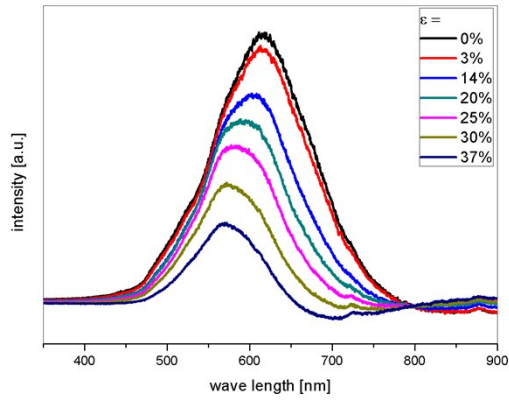

**Fig. S12.** Reflection spectra of elastomeric opal film dependent on strain  $\epsilon$ .

**Table S2.** Calculation of reflected wave lengths  $\lambda_{111}$  and relative reflectivity  $R$  for various opal film materials and particle diameter.

| material                             | particle diameter | reflected wave length | relative reflectivity |
|--------------------------------------|-------------------|-----------------------|-----------------------|
| Opal film PE/SiO <sub>2</sub>        | 670 nm            | 1430 nm               | 0.005                 |
| Opal film PE/SiO <sub>2</sub>        | 350 nm            | 745 nm                | 0.005                 |
| Opal film PEcoPBzMA/SiO <sub>2</sub> | 350 nm            | 755 nm                | 0.071                 |
| Inversopal SiO <sub>2</sub> /air     | 350 nm            | 628 nm                | 0.998                 |

The reflected wave length  $\lambda_{111}$  was calculated according to the following equation<sup>1</sup>:

$$\lambda_{111} = 2d \sqrt{\frac{3}{2} n_{eff} \sin \delta}$$

The relative reflectivity  $R$  is calculated according to the following equation<sup>2</sup>:

$$R = \left[ \frac{(n_0 - n_s \left( \frac{n_1}{n_2} \right)^{2N})^2}{(n_0 + n_s \left( \frac{n_1}{n_2} \right)^{2N})} \right]^2$$

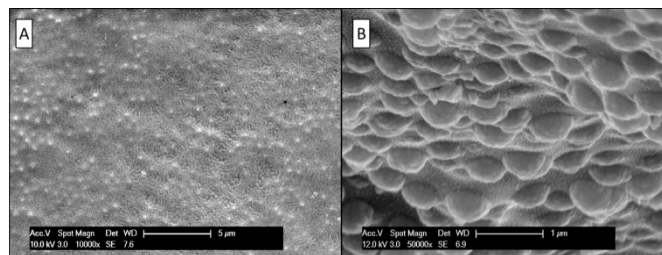

**Fig. S13.** SEM image of polymer film surface (A) and cross section (B) of elastomeric polymer film containing yolk/shell particles.

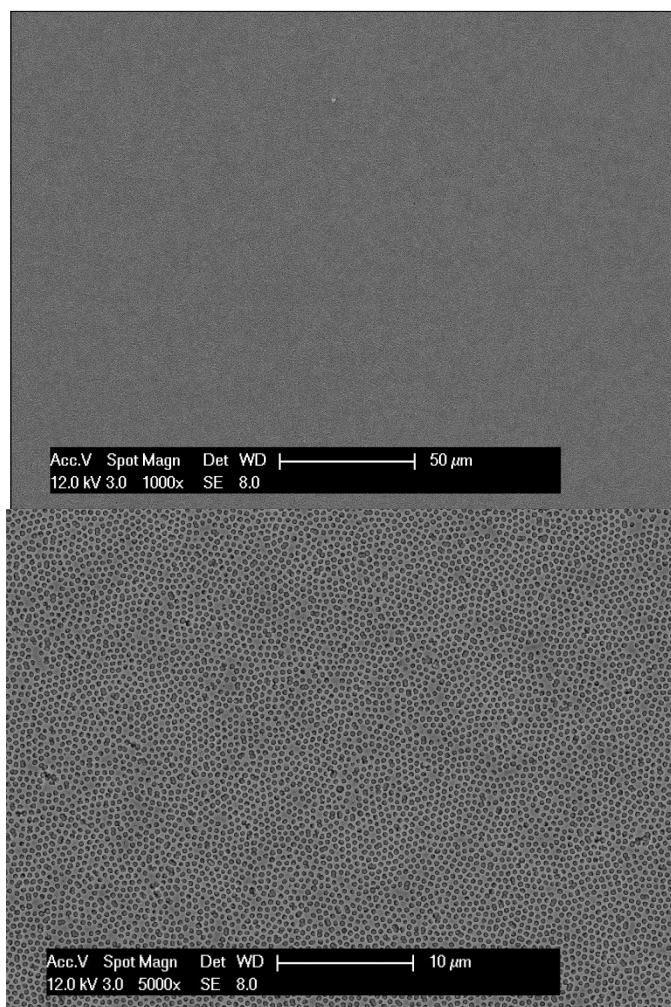

**Fig. S14.** SEM topography image of double inverse opal film.

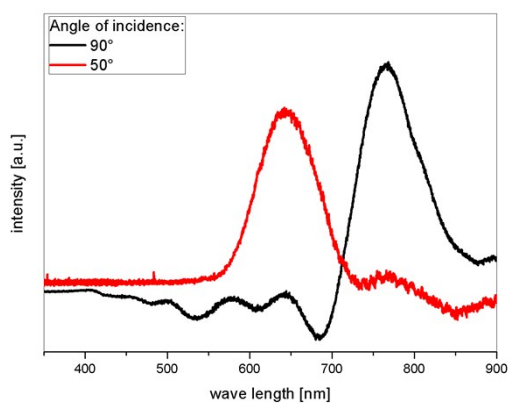

**Fig. S15.** UV/Vis reflection spectra of double-inverse opal film prepared by vertical deposition at 90° and 50° angle of incidence.

## References

1. L. Gonzalez-Urbina, K. Baert, B. Kolaric, J. Perez-Moreno and K. Clays, *Chemical reviews*, 2012, **112**, 2268-2285.
2. J. Ge and Y. Yin, *Angew. Chem. Int. Ed. Engl.*, 2011, **50**, 1492-1522.
